# Supplementary material for: Eco-efficient and green method for the enhanced dissolution of aromatic crude oil sludge using ionic liquids
Source: Royal Society of Chemistry journal article supplement (doi:10.1039/c4ra03425b), 2014-01-01
Supplement: c4ra03425b1.pdf [file c4ra03425b1.pdf]

### ELECTRONIC SUPPLEMENTARY INFORMATION

Figure S1: UV absorption showing the effect of ionic liquids on TBS in toluene (TBS:ILs=1:1). (a) Effect of [BMIM]<sup>+</sup>[Cl]<sup>-</sup> (b) Effect of [BMIM]<sup>+</sup>[Br]<sup>-</sup> (c) Effect of [BMIM]<sup>+</sup>[BF<sub>4</sub>]<sup>-</sup> (d) Effect of [BMIM]<sup>+</sup>[H<sub>2</sub>PO<sub>4</sub>]<sup>-</sup> (e) Effect of [BMIM]<sup>+</sup>[HSO<sub>4</sub>]<sup>-</sup> (f) Effect of [BMIM]<sup>+</sup>[PF<sub>6</sub>]<sup>-</sup> (g) Effect of [HMIM]<sup>+</sup>[Br]<sup>-</sup> (h) Effect of [HMIM]<sup>+</sup>[HSO<sub>4</sub>]<sup>-</sup> (i) Effect of [OMIM]<sup>+</sup>[Cl]<sup>-</sup>

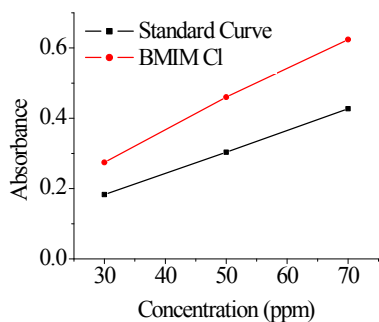

(a)

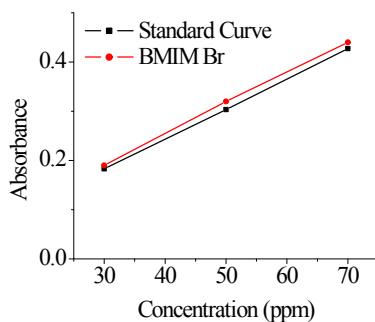

(b)

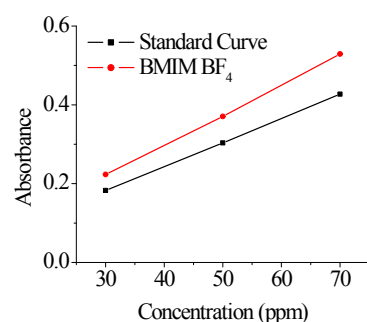

(c)

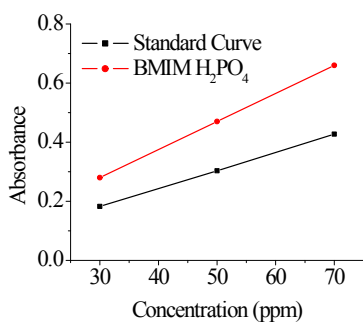

(d)

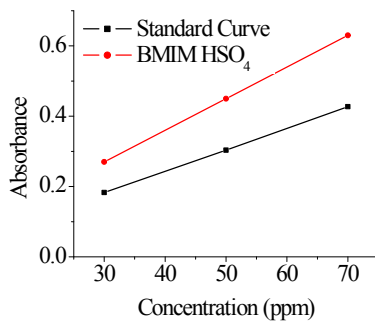

(e)

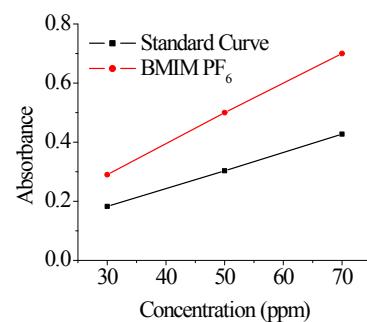

(f)

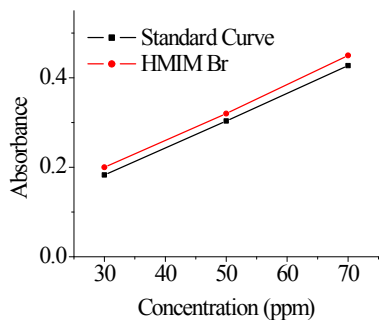

(g)

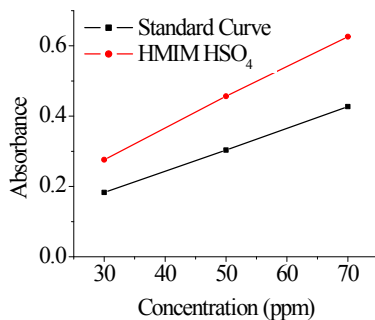

(h)

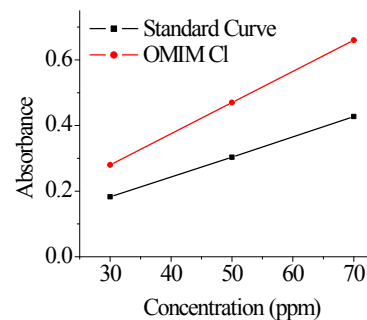

(i)

Figure S2: UV absorption showing the effect of ionic liquids on TBS in decane (TBS:ILs=1:1). (a) Effect of [BMIM]<sup>+</sup>[Cl]<sup>-</sup> (b) Effect of [BMIM]<sup>+</sup>[Br]<sup>-</sup> (c) Effect of [BMIM]<sup>+</sup>[BF<sub>4</sub>]<sup>-</sup> (d) Effect of [BMIM]<sup>+</sup>[H<sub>2</sub>PO<sub>4</sub>]<sup>-</sup> (e) Effect of [BMIM]<sup>+</sup>[HSO<sub>4</sub>]<sup>-</sup> (f) Effect of [BMIM]<sup>+</sup>[PF<sub>6</sub>]<sup>-</sup> (g) Effect of [HMIM]<sup>+</sup>[Br]<sup>-</sup> (h) Effect of [HMIM]<sup>+</sup>[HSO<sub>4</sub>]<sup>-</sup> (i) Effect of [OMIM]<sup>+</sup>[Cl]<sup>-</sup>

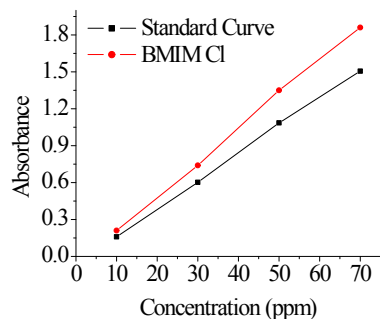

(a)

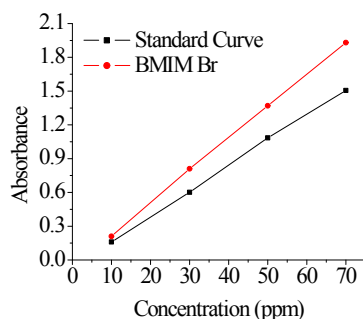

(b)

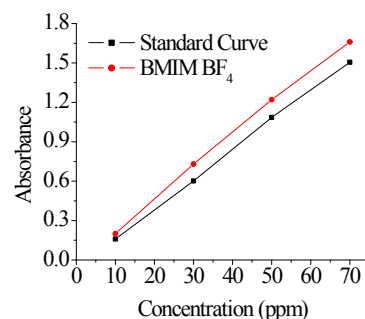

(c)

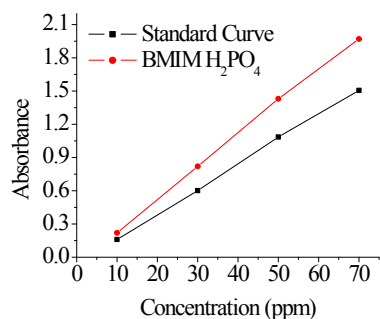

(d)

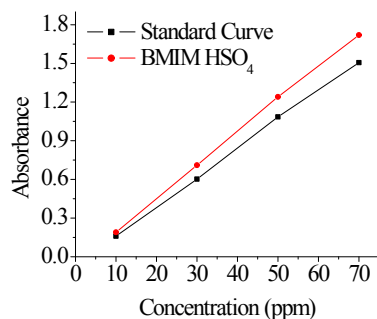

(e)

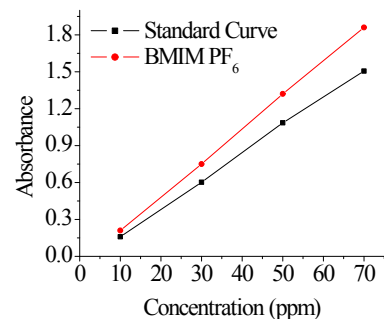

(f)

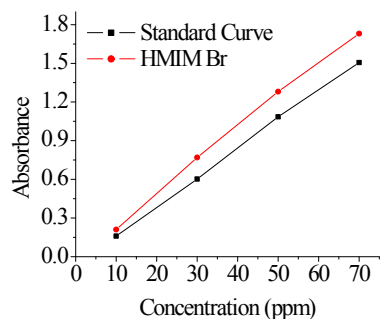

(g)

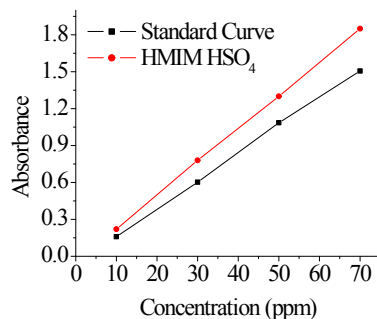

(h)

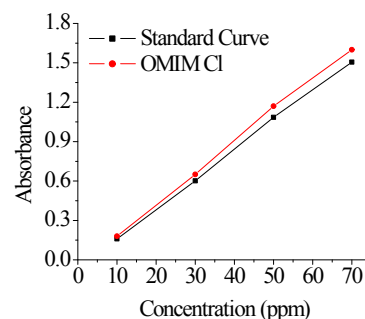

(i)

Figure S3: UV absorption showing the effect of ionic liquids on TBS in ethyl acetate (TBS:ILs=1:1). (a) Effect of [BMIM]<sup>+</sup>[Cl]<sup>-</sup> (b) Effect of [BMIM]<sup>+</sup>[Br]<sup>-</sup> (c) Effect of [BMIM]<sup>+</sup>[BF<sub>4</sub>]<sup>-</sup> (d) Effect of [BMIM]<sup>+</sup>[H<sub>2</sub>PO<sub>4</sub>]<sup>-</sup> (e) Effect of [BMIM]<sup>+</sup>[HSO<sub>4</sub>]<sup>-</sup> (f) Effect of [BMIM]<sup>+</sup>[PF<sub>6</sub>]<sup>-</sup> (g) Effect of [HMIM]<sup>+</sup>[Br]<sup>-</sup> (h) Effect of [HMIM]<sup>+</sup>[HSO<sub>4</sub>]<sup>-</sup> (i) Effect of [OMIM]<sup>+</sup>[Cl]<sup>-</sup>

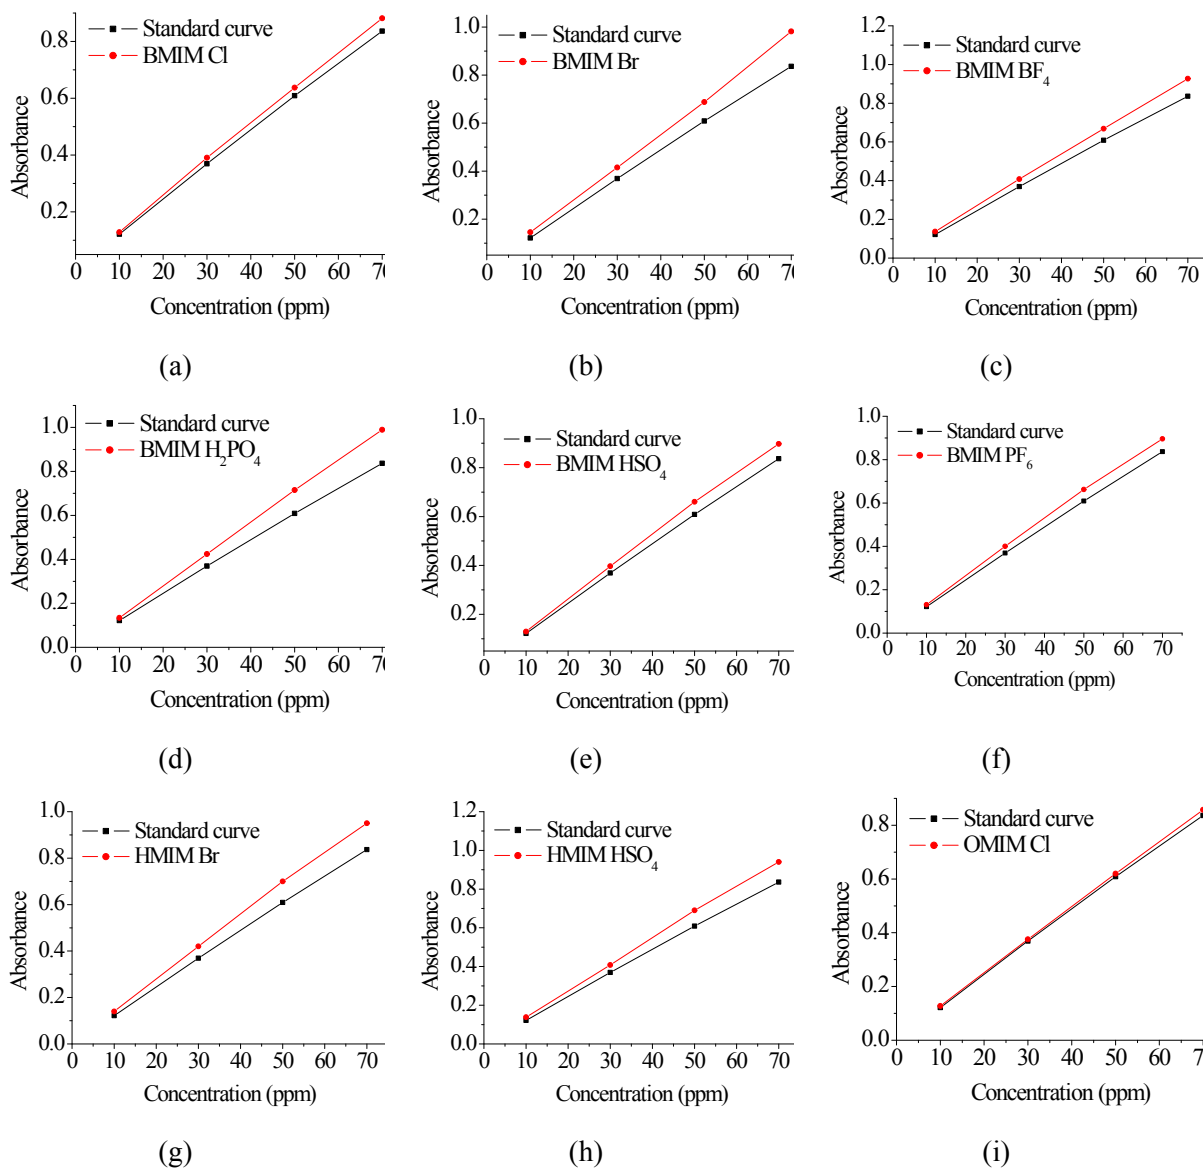

Figure S4: UV absorption showing the effect of ionic liquids on TBS in hexane (TBS:ILs=1:1). (a) Effect of [BMIM]<sup>+</sup>[Cl]<sup>-</sup> (b) Effect of [BMIM]<sup>+</sup>[Br]<sup>-</sup> (c) Effect of [BMIM]<sup>+</sup>[BF<sub>4</sub>]<sup>-</sup> (d) Effect of [BMIM]<sup>+</sup>[H<sub>2</sub>PO<sub>4</sub>]<sup>-</sup> (e) Effect of [BMIM]<sup>+</sup>[HSO<sub>4</sub>]<sup>-</sup> (f) Effect of [BMIM]<sup>+</sup>[PF<sub>6</sub>]<sup>-</sup> (g) Effect of [HMIM]<sup>+</sup>[Br]<sup>-</sup> (h) Effect of [HMIM]<sup>+</sup>[HSO<sub>4</sub>]<sup>-</sup> (i) Effect of [OMIM]<sup>+</sup>[Cl]<sup>-</sup>

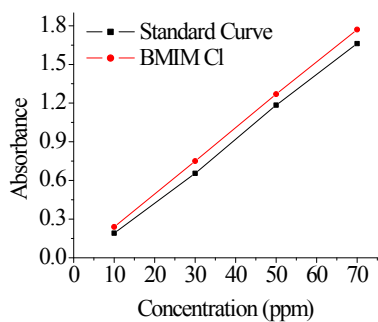

(a)

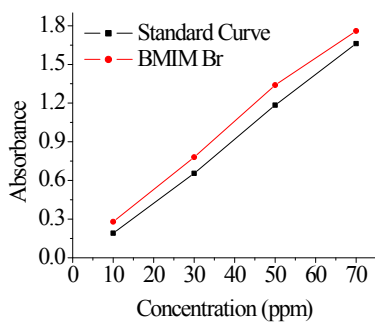

(b)

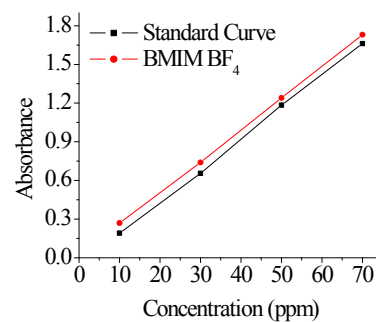

(c)

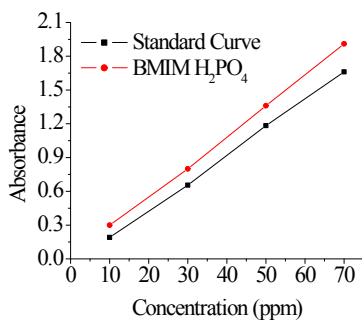

(d)

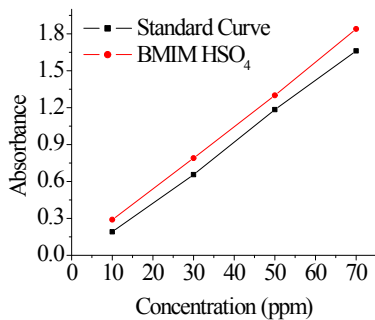

(e)

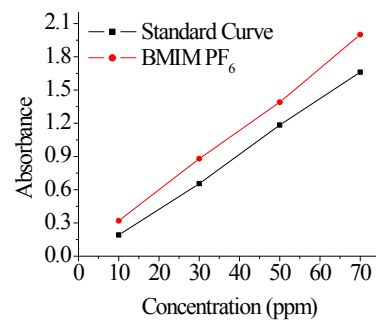

(f)

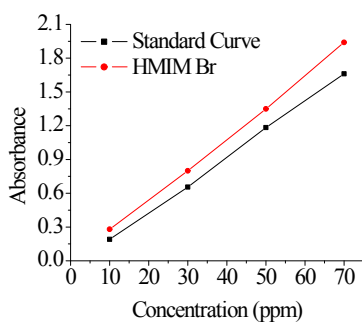

(g)

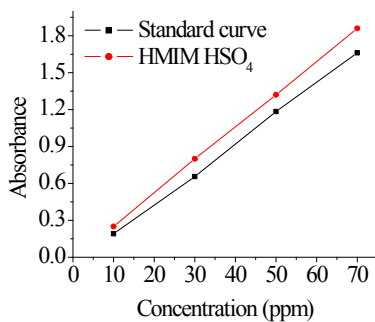

(h)

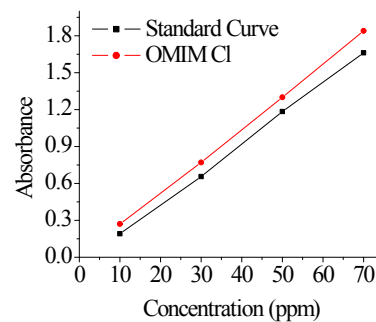

(i)

Figure S5: Full scan UV spectra of TBS in (i) heptane and (ii) toluene, both in the absence and presence of BMIM PF<sub>6</sub> at different concentrations.

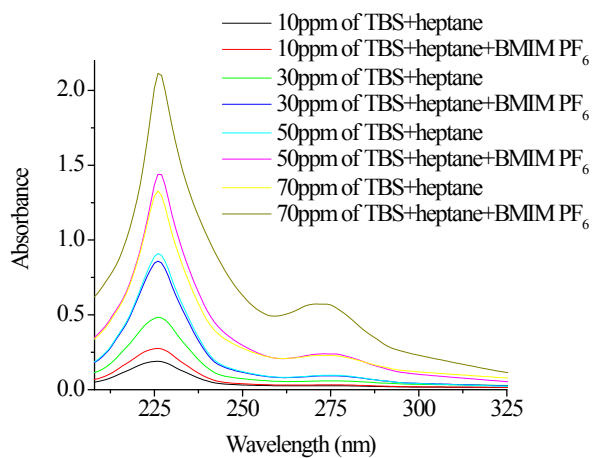

(i)

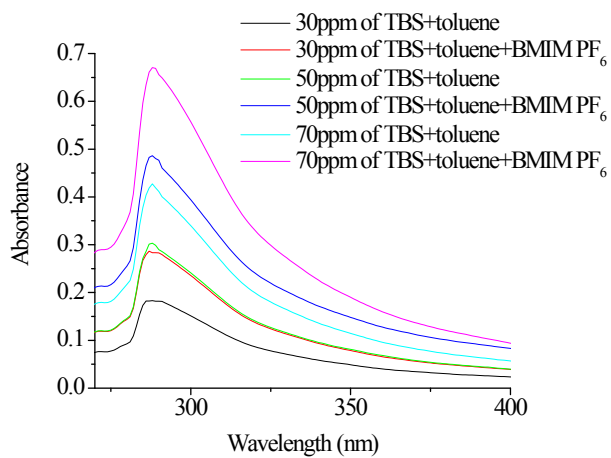

(ii)
